# Supplementary material for: Human kinetochores are swivel joints that mediate microtubule attachments
Source: eLife. 2016 Sep 3;5:e16159. doi: 10.7554/eLife.16159 (PMC5050023; doi:10.7554/eLife.16159)
Supplement: Figure 1—source data 1. — Table of measurements of Δ 3D for all kinetochore markers imaged in untreated and 3 µM nocodazole-treated cells. Values given are medians ± standard error, and p values were given by Mann-Whitney U tests. DOI: http://dx.doi.org/10.7554/eLife.16159.003 [file elife-16159-fig1-data1.xls]

## Sheet: Sheet1
	Figure 1–source data 1
	D3D measurements, untreated vs. nocodazole-treated
	Inner domain marker	Outer domain marker	live / PFA	untreated		3mm nocodazole		difference in noc. (nm)	p
				D 3D (± s.e.m.) (nm)	n	D 3D (± s.e.m.) (nm)	n
	eGFP-CENP-A	Ndc80-tagRFP	live	98.0 ± 0.9	4291	93.1 ± 2.2	649	–4.9	1.17 x 10–2
	eGFP-CENP-A	Ndc80-tagRFP	PFA	95.4 ± 1.8	380	88.3 ± 1.7	961	–7.1	6.72 x 10–4
	eGFP-CENP-A	mCherry-Mis12	live	76.9 ± 1.1	4720	71.6 ± 0.9	4407	–5.3	4.36 x 10–18
	eGFP-CENP-A	Nnf1-Alexa594	PFA	88.9 ± 0.9	2427	84.2 ± 1.0	3069	–4.7	2,84 x 10–11
	eGFP-CENP-A	mCherry-Ndc80	PFA	128.8 ± 1.9	1409	112.2 ± 2.8	641	–16.6	1.93 x 10–9
	CENP-A-Alexa488	Ndc80-tagRFP	PFA	81.7 ± 0.7	3302	84.3 ± 1.7	1717	+2.6	2.94 x 10–3
	mCherry-CENP-A	Bub3-eGFP	live	151.5 ± 2.5	2480				10–x
	CENP-C-Alexa488	mCherry-Ndc80	PFA	102.7 ± 0.8	8569	85.7 ± 0.7	7476	–17.0	4.16 x 10–143
	GFP-CENP-C	Ndc80-tagRFP	live	77.1 ± 2.2	567	69.5 ± 1.3	1463	–7.6	3.50 x 10–8
	GFP-CENP-C	mCherry-Ndc80	live	101.4 ± 1.8	1769	89.9 ± 2.6	898	–11.5	1.21 x 10–12
	GFP-CENP-O	Ndc80-tagRFP	live	80.9 ± 1.2	1881				10–x
