# Supplementary material for: Human kinetochores are swivel joints that mediate microtubule attachments
Source: eLife. 2016 Sep 3;5:e16159. doi: 10.7554/eLife.16159 (PMC5050023; doi:10.7554/eLife.16159)
Supplement: Figure 2—source data 1. — Table of measurements of Δ 1D, Δ 2D, ϑ 3D-swivel and standard deviation of ϑ y-swivel distribution for all kinetochore markers imaged in untreated and 3 µM nocodazole-treated cells. n values correspond to all measurements in columns to the left of the n-value column. Values given are medians ± standard error. DOI: http://dx.doi.org/10.7554/eLife.16159.009 [file elife-16159-fig2-data1.xls]

## Sheet: Sheet1
	Figure 2–source data 1
	D2D, D1D and Jswivel measurements, untreated vs. nocodazole-treated
	Inner domain marker	Outer domain marker	+ / – nocodazole	D 1D (± s.e.m.) (nm)	n	D 2D (± s.e.m.) (nm)	J 3D-swivel (± s.e.m.) (º)	std( J y-swivel ) (º)	n
	eGFP-CENP-A	Ndc80-tagRFP	–	57.9 ± 1.1	1002	78.2 ± 0.9	51.6 ± 0.5	56.4	4291
			+	17.8 ± 4.4	138	71.4 ± 2.3	73.8 ± 1.6	89.4	649
	eGFP-CENP-A	Nnf1-Alexa594	–	56.1 ± 1.2	897	69.7 ± 0.9	48.3 ± 0.6	54.5	2427
			+	16.4 ± 1.2	1120	62.0 ± 1.0	74.1 ± 0.7	84.7	3069
	GFP-CENP-C	Ndc80-tagRFP	–	45.4 ± 1.8	190	56.7 ± 2.2	50.3 ± 1.1	46.4	567
			+	13.2 ± 1.4	507	43.8 ± 1.3	79.6 ± 1.0	89	1463
