# Supplementary material for: Human kinetochores are swivel joints that mediate microtubule attachments
Source: eLife. 2016 Sep 3;5:e16159. doi: 10.7554/eLife.16159 (PMC5050023; doi:10.7554/eLife.16159)
Supplement: Figure 4—source data 1. — Median and standard error values for the bar plots in Figure 4E of ϑy-swivel and 1D (left) and 3D (right) measurements of Δ, comparing kinetochore pairs during early and late metaphase, shown in Figure 4E. ϑy-swivel and Δ 1D significantly increase and decrease, respectively, however 3D does not change. DOI: http://dx.doi.org/10.7554/eLife.16159.016 [file elife-16159-fig4-data1.xls]

## Sheet: Sheet1
	Figure 4–source data 1
	Intra-kinetochore measurements, spatial and temporal
	Measurement	Position in plate	Time in metaphase	Median	Standard error	n	p
	| J y-swivel | (º)	Centre	Early	33.5	1.3	906	< 10–4
			Late	23.1	1.2	748
		Periphery	Early	45.7	1.9	455	< 10–4
			Late	33.6	1.4	460
	D 1D (nm)	Centre	Early	51.4	2.3	197	< 10–4
			Late	64	2	176
		Periphery	Early	51.3	3.8	105	< 10–4
			Late	63	2.6	119
	D 1D (nm)	Centre	Early	98.4	1.7	906	0.89
			Late	96.9	1.8	748
		Periphery	Early	102	4.6	455	0.37
			Late	103	1.9	460
