# Supplementary figures and images for: Human kinetochores are swivel joints that mediate microtubule attachments
Source: eLife journal article supplement (doi:10.7554/elife.16159), 2016-09-03

Figure 1–figure supplement 2, Smith et al.

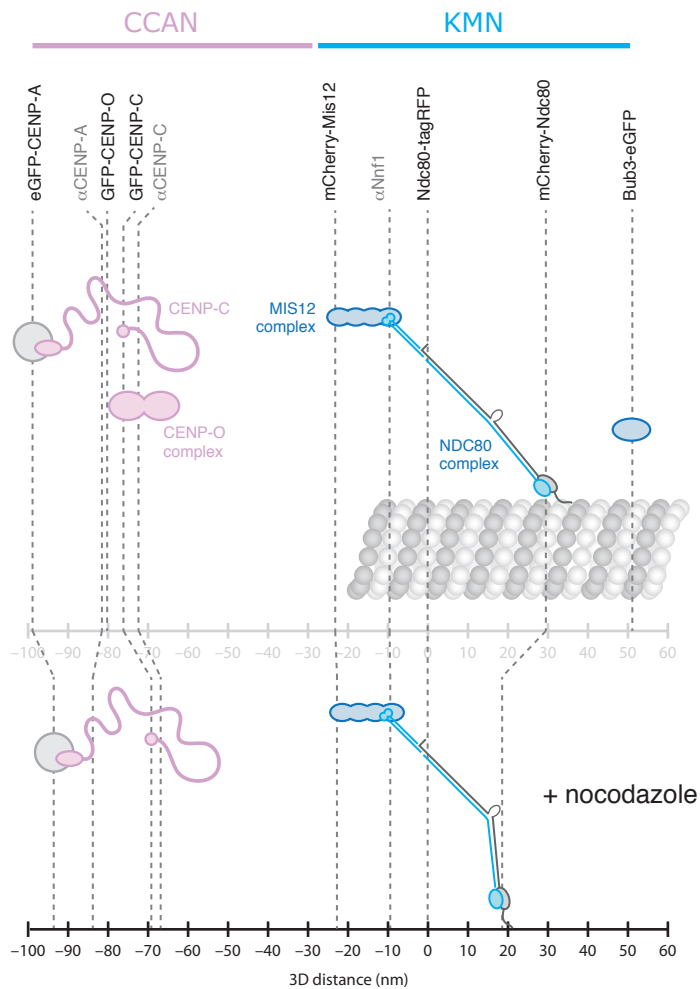

Supplement: supp [file elife-16159-supp-v1.zip]

Figure 2–figure supplement 2, Smith et al.

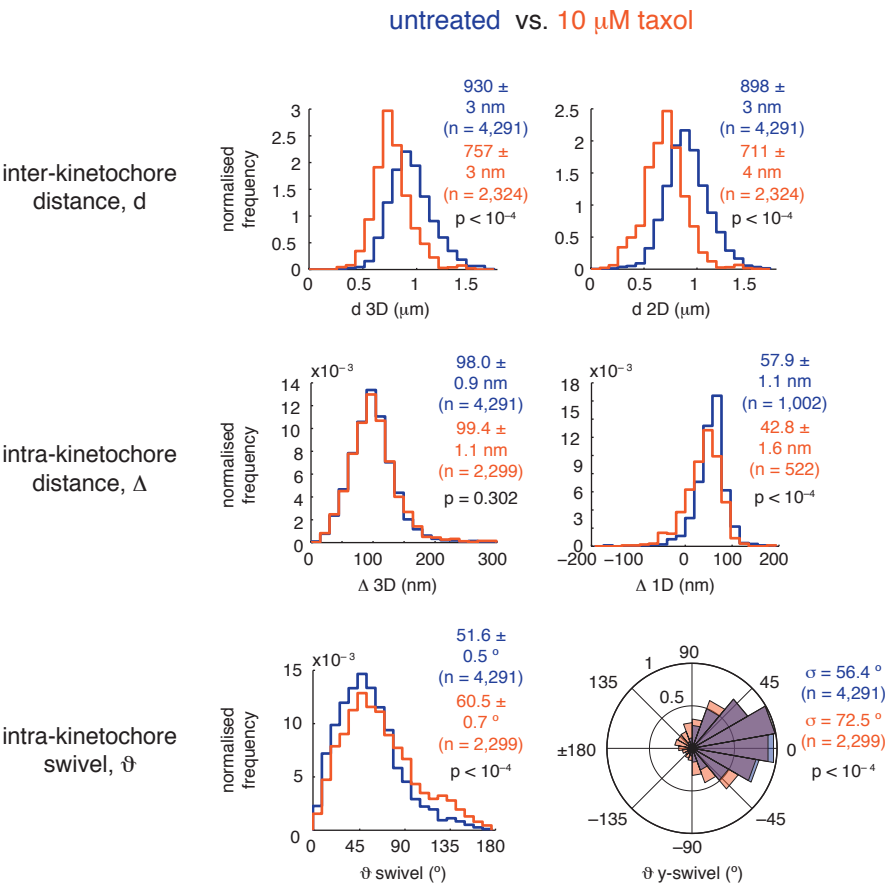

Supplement: supp [file elife-16159-supp-v1.zip]

Figure 2–figure supplement 3, Smith et al.

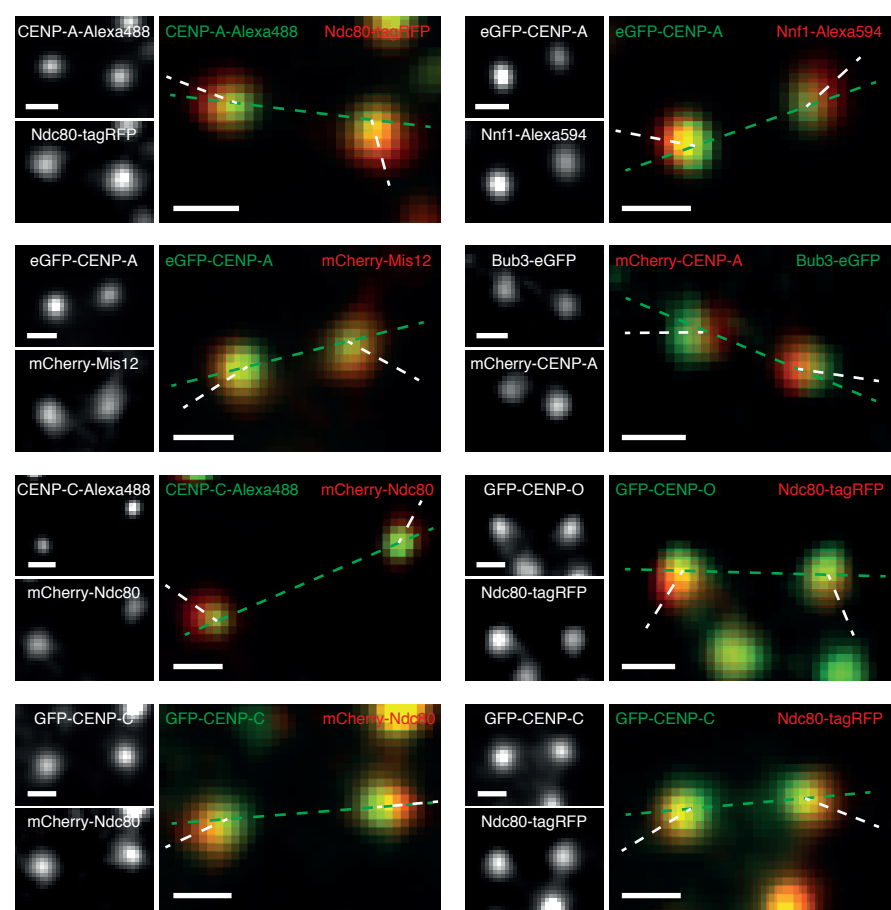

Supplement: supp [file elife-16159-supp-v1.zip]

Figure 1-figure supplement 4, Smith et al.

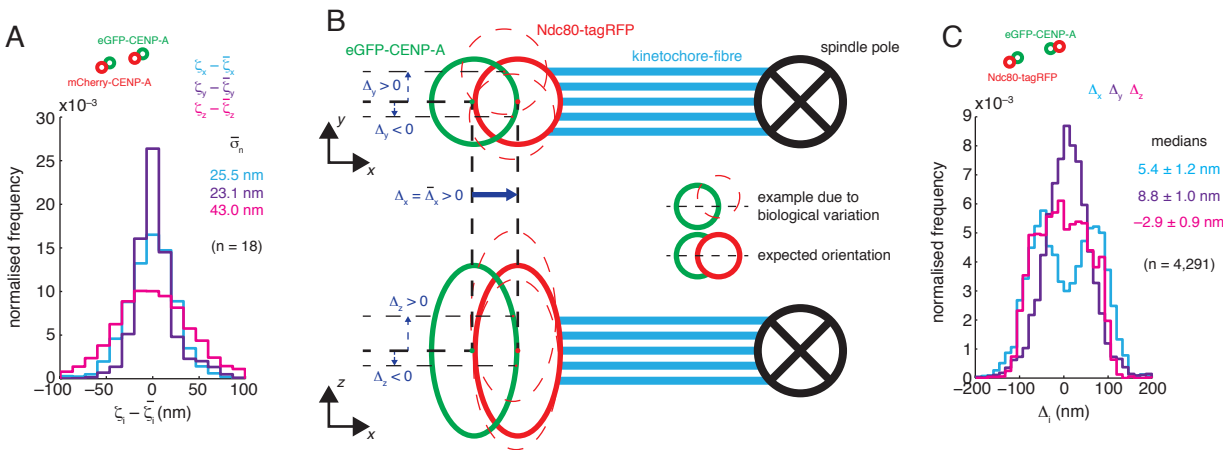

Supplement: supp [file elife-16159-supp-v1.zip]

Figure 2–figure supplement 1, Smith et al.

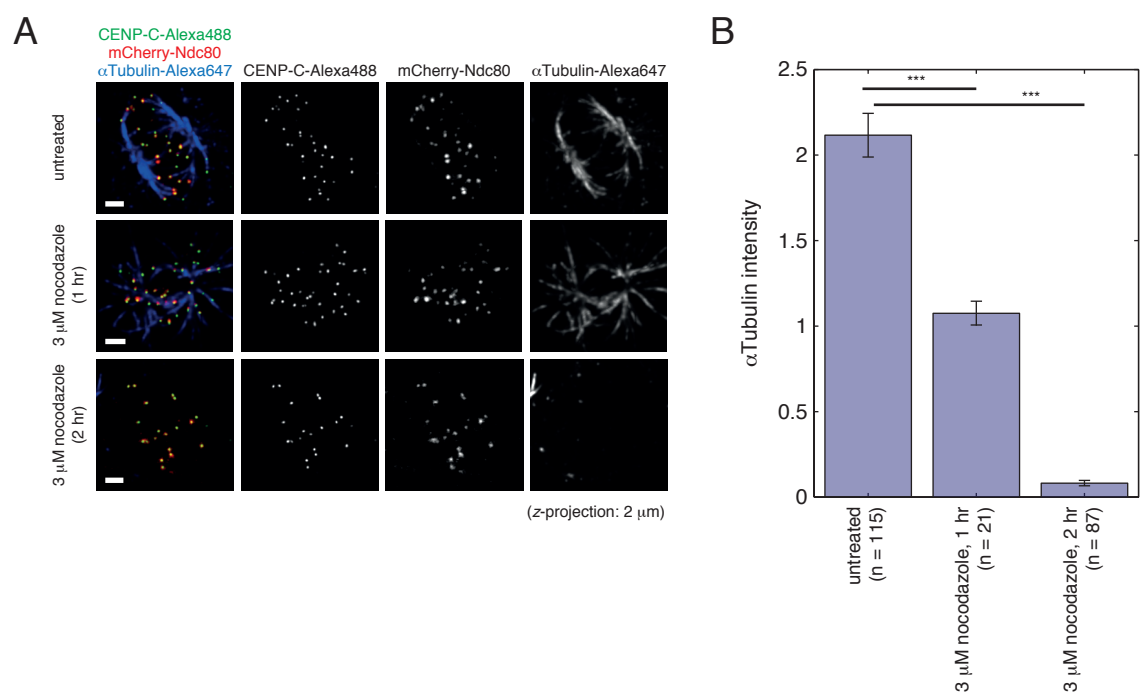

Supplement: supp [file elife-16159-supp-v1.zip]

Figure 4—figure supplement 1, Smith et al.

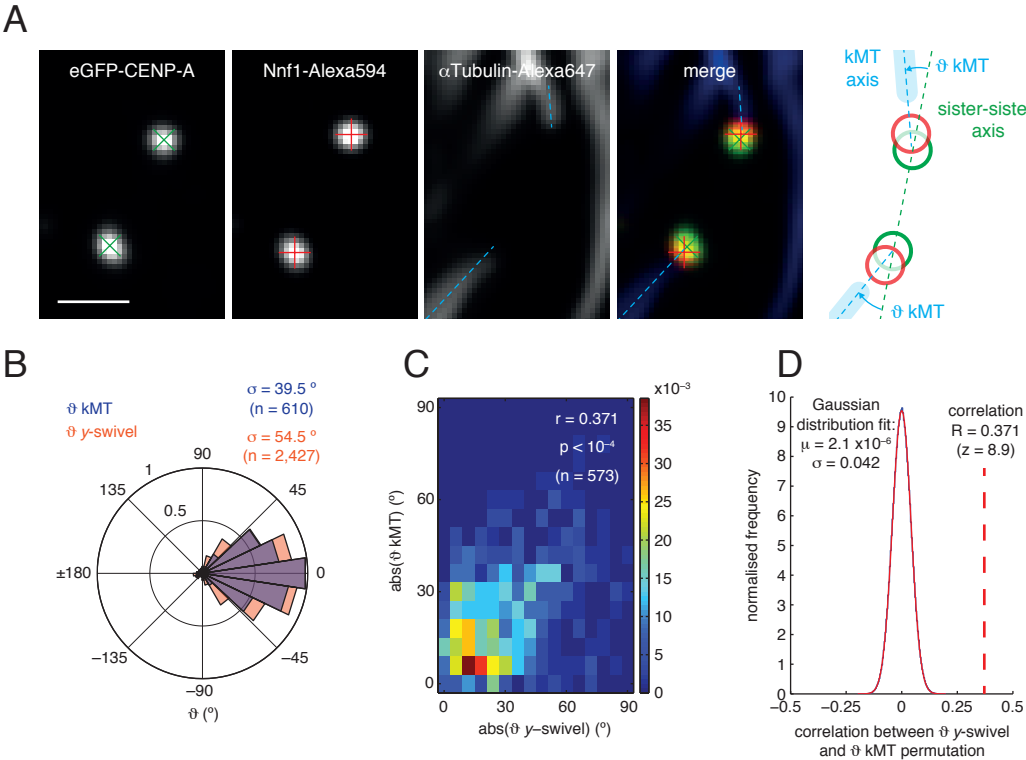

Supplement: supp [file elife-16159-supp-v1.zip]

Figure 3—figure supplement 1, Smith et al.

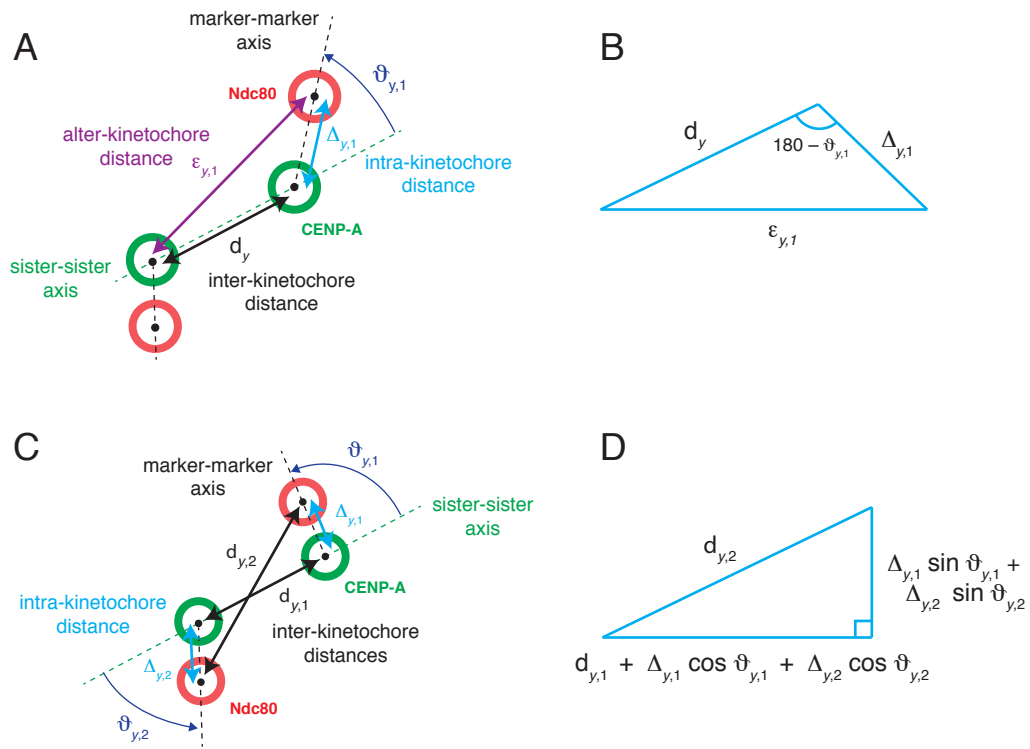

Supplement: supp [file elife-16159-supp-v1.zip]

Figure 1–figure supplement 1, Smith et al.

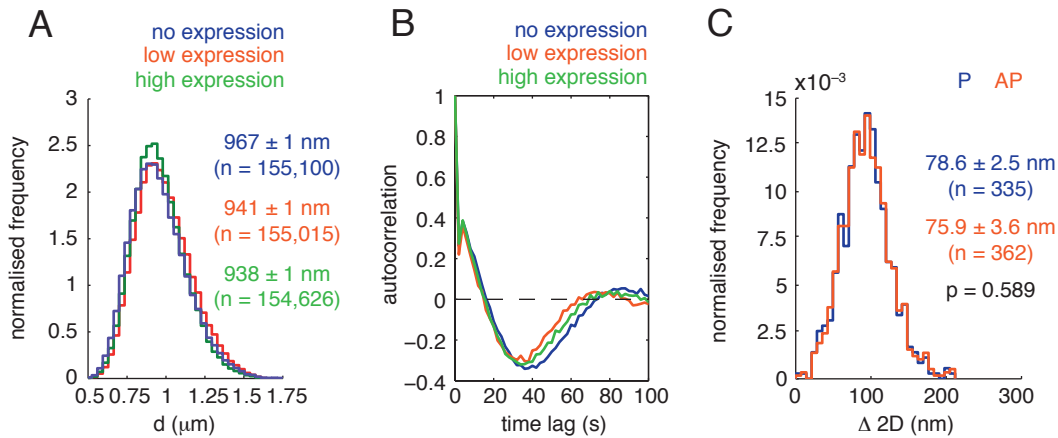

Supplement: supp [file elife-16159-supp-v1.zip]

Figure 1-figure supplement 3, Smith et al.

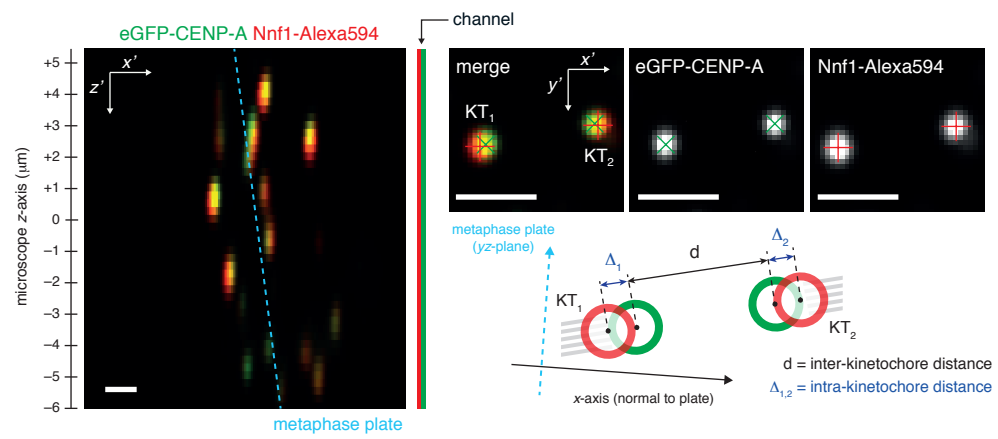

Supplement: supp [file elife-16159-supp-v1.zip]
